# Supplementary material
Source: publisher site journal article supplement (https://www.degruyterbrill.com/publication/isbn/9783050088037/downloadAsset/9783050088037_Buchinformation.pdf)
Supplement: Supplementary file 1 [file 9783050088037_Buchinformation.pdf]

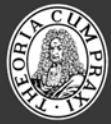

# Akademie Verlag

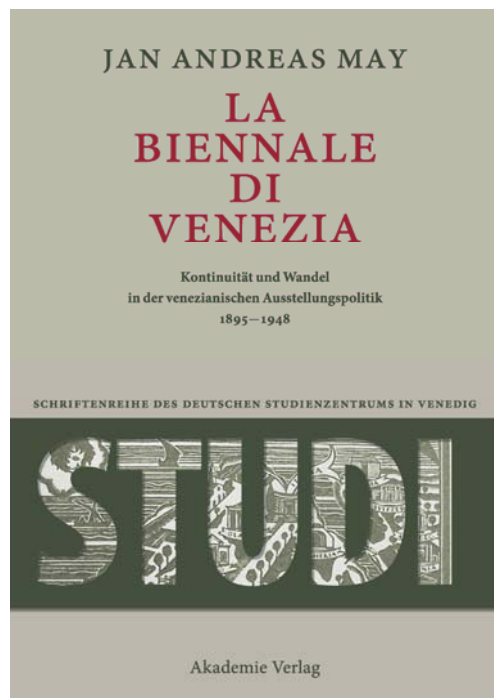

Jan Andreas May

## La Biennale di Venezia

Kontinuität und Wandel in der venezianischen  
Ausstellungspolitik 1895–1948

*STUDI. Schriftenreihe des Deutschen Studienzentrums  
in Venedig, Neue Folge, Band 2*

2009. VIII, 368 S. – 71 s/w- und 15 Farbabbb.  
170 x 240 mm, Festeinband, € 69,80  
ISBN 978-3-05-004527-6

La Biennale di Venezia gilt neben der documenta in Kassel als eine der wichtigsten Institutionen der internationalen Kunstwelt. Jan May untersucht in seiner Arbeit die Bedeutung der Internationalen Kunstausstellung, der Internationalen Filmkunstschau und der zahlreichen anderen kulturellen Aktivitäten der Biennale von den Anfängen Ende des 19. Jahrhunderts bis in die 1940er Jahre. Er analysiert ihre Funktion als Instrument der städtischen und später staatlichen Kulturpolitik und ordnet die Biennale in das internationale Ausstellungs- und Festivalwesen ein.

Chronologisch führt der Autor durch die Geschichte der 1895 als kleine Kunstausstellung gestarteten Ausstellungsreihe, die mit der Übernahme des nationalen Pavillonkonzepts 1907 vor und nach dem Ersten Weltkrieg große Erfolge feiern konnte. Die internationale Resonanz auf die Biennale, die anhand zahlreicher Quellen dokumentiert wird, war ein Garant für diesen Erfolg. Die Verstaatlichung 1930 und der damit verbundene infrastrukturelle Ausbau machten die Biennale zur wichtigsten internationalen Kunstausstellungsreihe weltweit. Die Abkehr von der Internationalität führte Ende der 1930er Jahre mit der Kooperation mit der nationalsozialistischen Kulturpolitik zu ihrer größten Krise. Die Arbeit endet mit dem Jahr 1948, dem Startpunkt der bis heute anhaltenden Erfolgsgeschichte, deren Grundlagen jedoch in den Entwicklungen der ersten 50 Jahre ihres Bestehens liegen.

Der Autor zeigt, wie intensiv und wie konsequent Venedig die Chance ergriffen hat, aus einem alle zwei Jahre wiederkehrenden kulturellen Großereignis einen wichtigen Motor des modernen Lebens in der Lagunenstadt zu machen. Hier galt es wichtige Forschungslücken zu schließen, aber auch Erkenntnisse verschiedener Disziplinen zusammenzufassen. Es wird deutlich, dass die Flexibilität und Innovationsfreude, vor allem aber auch die von Beginn an feste Verwurzelung in Politik und Wirtschaft maßgeblich zum Erfolg der Biennale beigetragen haben.
